# Supplementary material
Source: HighWire-hosted journal article supplement (https://bmjopen.bmj.com/content/13/11/e070703)
Supplement: inline-supplementary-material-1 [file inline-supplementary-material-1.pdf]

Supplementary Table 1. Time schedule of participant enrollment, interventions, assessments and visits

| Items                      | Screening    | Cycle 1          |                    |                  |                    | Cycle 2          |                    |                  |                    | Cycle 3          |                    |                  |                    |
|----------------------------|--------------|------------------|--------------------|------------------|--------------------|------------------|--------------------|------------------|--------------------|------------------|--------------------|------------------|--------------------|
|                            |              | Washout period 1 | Treatment period 1 | Washout period 2 | Treatment period 2 | Washout period 1 | Treatment period 1 | Washout period 2 | Treatment period 2 | Washout period 1 | Treatment period 1 | Washout period 2 | Treatment period 2 |
|                            | Day -3 to -1 | Week 1           | Week 2             | Week 3           | Week 4             | Week 5           | Week 6             | Week 7           | Week 8             | Week 9           | Week 10            | Week 11          | Week 12            |
| Eligibility criteria       | X            |                  |                    |                  |                    |                  |                    |                  |                    |                  |                    |                  |                    |
| Informed consent           | X            |                  |                    |                  |                    |                  |                    |                  |                    |                  |                    |                  |                    |
| Baduanjin training         | X            |                  |                    |                  |                    |                  |                    |                  |                    |                  |                    |                  |                    |
| Demographic characteristic |              | X                |                    |                  |                    |                  |                    |                  |                    |                  |                    |                  |                    |
| Randomization              |              |                  | X                  |                  | X                  |                  | X                  |                  | X                  |                  | X                  |                  | X                  |
| VAS                        |              |                  | X                  |                  | X                  |                  | X                  |                  | X                  |                  | X                  |                  | X                  |
| ODI                        |              |                  | X                  |                  | X                  |                  | X                  |                  | X                  |                  | X                  |                  | X                  |
| JOABPEQ                    |              |                  | X                  |                  | X                  |                  | X                  |                  | X                  |                  | X                  |                  | X                  |
| SF-12                      |              |                  | X                  |                  | X                  |                  | X                  |                  | X                  |                  | X                  |                  | X                  |
| Drug combination           |              | X                | X                  | X                | X                  | X                | X                  | X                | X                  | X                | X                  | X                | X                  |
| Safety                     |              | X                | X                  | X                | X                  | X                | X                  | X                | X                  | X                | X                  | X                | X                  |

VAS, Visual Analogue Scale; ODI, Oswestry Disability Index; JOABPEQ, Japanese Orthopaedic Association Back Pain Evaluation Questionnaire; SF-12, Short Form Health Survey 12
